# Supplementary material
Source: publisher figshare collection journal article supplement (https://acs.figshare.com/ndownloader/files/8643109)
Supplement: Supplementary file 1 [file 8643109]

Supporting Information

Fabrication of Silk Scaffolds with Nano-Microscaled Structures  
and Tunable Stiffness

Liyang Xiao<sup>a,#</sup>, Shanshan Liu<sup>b,#</sup>, Danyu Yao<sup>a</sup>, Zhaozhao Ding<sup>a</sup>, Zhihai Fan<sup>c</sup>, Qiang Lu<sup>a,\*</sup>, David L

Kaplan<sup>d</sup>

<sup>a</sup>National Engineering Laboratory for Modern Silk & Collaborative Innovation Center  
of Suzhou Nano Science and Technology, Soochow University, Suzhou 215123,  
People's Republic of China

<sup>b</sup>School of Medicine, Shenzhen University, Shenzhen 518060, People's Republic of  
China

<sup>c</sup>Department of Orthopedics, The Second Affiliated Hospital of Soochow University,  
Suzhou 215000, People's Republic of China

<sup>d</sup>Department of Biomedical Engineering, Tufts University, Medford, MA 02155, USA

Corresponding author:

Qiang Lu, Tel: (+86)-512-67061649; E-mail: Lvqiang78@suda.edu.cn

<sup>#</sup> The authors have contributed equally to the first author

## **Experimental Section**

### **SEM**

The morphology of the scaffolds was observed using scanning electron microscopy (SEM, Hitachi S-4800, Hitachi, Tokyo, Japan) at 3 kV. Samples were mounted on a copper plate and sputter-coated with gold prior to imaging.<sup>1</sup>

### **Silk Dissolution**

The scaffolds were incubated in phosphate saline (PBS) at 37 °C to evaluate degradation behaviors.<sup>2, 3, 4</sup> Samples ( $40 \pm 5$  mg) were soaked in PBS solution at scaffold/solution weight ratios of 1:99. At designated time points (1, 3, 6, 9, and 12 days), five samples for each group were rinsed with distilled water and prepared for mass balance assessment.

## Results

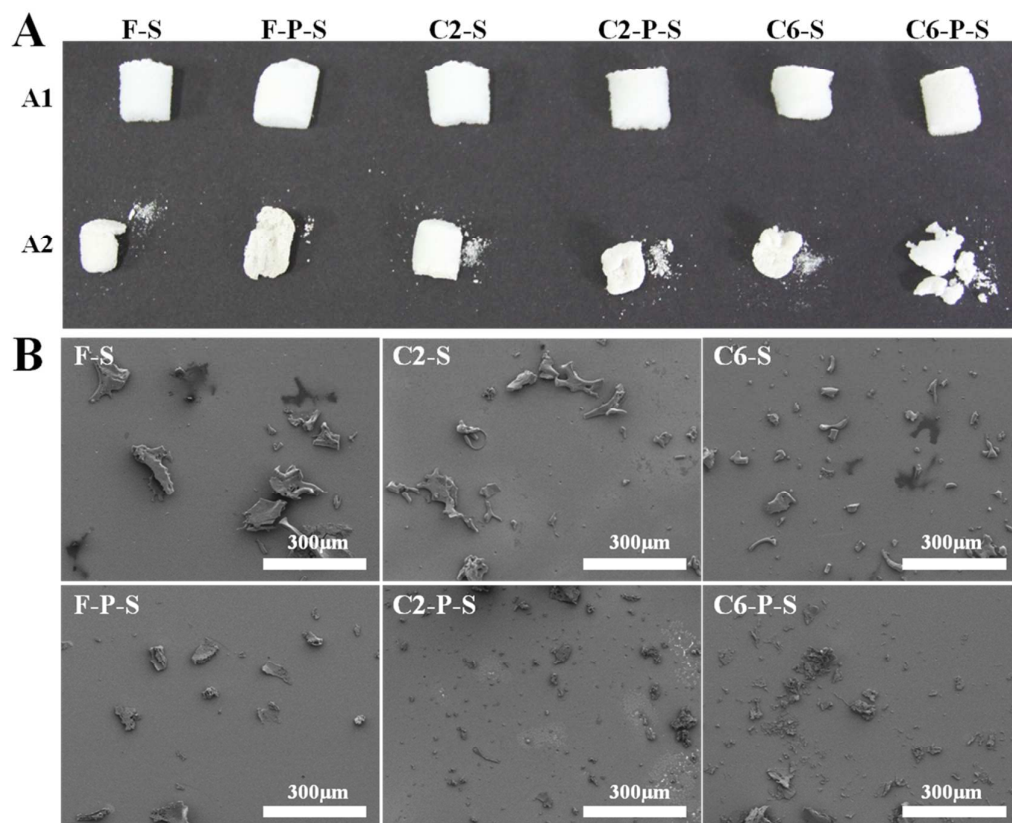

**Figure S1.** Macroscopic view of the silk scaffolds before (A1) and after cultured in PBS solution

for 9 d at 37°C (A2); SEM image of the powder exfoliated from silk scaffolds after 9 d at 37°C (B).

The samples were as follows: F-S, silk scaffolds prepared by salt-leaching process; F-P-S, silk scaffolds derived from silk solution with pH adjustment; C2-S, silk scaffolds derived from fast concentrated silk solution; C2-P-S, silk scaffolds derived from fast concentrated silk solution with pH adjustment; C6-S, silk scaffolds derived from slowly concentrated silk solution; C6-P-S, silk scaffolds derived from slowly concentrated silk solution with pH adjustment.

## Supporting Information References

- (1) Bai, S. M.; Han, H. Y.; Huang, X. W.; Xu, W. A.; Kaplan, D. L.; Zhu, H. S.; Lu, Q. *Acta Biomater.* **2015**, *20*, 22-31.
- (2) Yao, D. Y.; Dong, S.; Lu, Q.; Hu, X.; Kaplan, D. L.; Zhang, B. B.; Zhu, H. S. *Biomacromolecules* **2012**, *13*, 3723-3729.
- (3) Han, H. Y.; Ning, H. Y.; Liu, S. S.; Lu, Q.; Fan, Z. H.; Lu, H. J.; Lu, G. Z.; Kaplan, D. L. *Adv. Funct. Mater.* **2015**, *26*, 421-433.
- (4) Jin, H. J.; Park, J.; Karageorgiou, V.; Kim, U. J.; Valluzzi, R.; Cebe, P.; Kaplan, D. L. *Adv. Funct. Mater.* **2005**, *15*, 1241-1247.
